# Supplementary material
Source: PubMed Central journal article supplement (PMC8052289)
Supplement: NIHMS1663942-supplement-1.pdf [file NIHMS1663942-supplement-1.pdf]

## Supplementary Information

# Chemoproteomics-Enabled Discovery of Covalent RNF114-Based Degraders that Mimic Natural Product Function

Mai Luo<sup>1,2</sup>, Jessica N. Spradlin<sup>1,2</sup>, Lydia Boike<sup>1,2</sup>, Bingqi Tong<sup>1,2</sup>, Scott M. Brittain<sup>2,3</sup>, Jeffery M. McKenna<sup>2,3</sup>, John A. Tallarico<sup>2,3</sup>, Markus Schirle<sup>2,3</sup>, Thomas J. Maimone<sup>1,2,#</sup>, and Daniel K. Nomura<sup>1,2,4,5,6,#</sup>

<sup>1</sup> Department of Chemistry, University of California, Berkeley, Berkeley, CA 94720 USA

<sup>2</sup> Novartis-Berkeley Center for Proteomics and Chemistry Technologies

<sup>3</sup> Novartis Institutes for BioMedical Research, Cambridge, MA 02139 USA

<sup>4</sup> Department of Molecular and Cell Biology, University of California, Berkeley, Berkeley, CA 94720 USA

<sup>5</sup> Department of Nutritional Sciences and Toxicology, University of California, Berkeley, Berkeley, CA 94720 USA

<sup>6</sup> Innovative Genomics Institute, Berkeley, CA 94720 USA

# correspondence to [maimone@berkeley.edu](mailto:maimone@berkeley.edu) and [dnomura@berkeley.edu](mailto:dnomura@berkeley.edu)

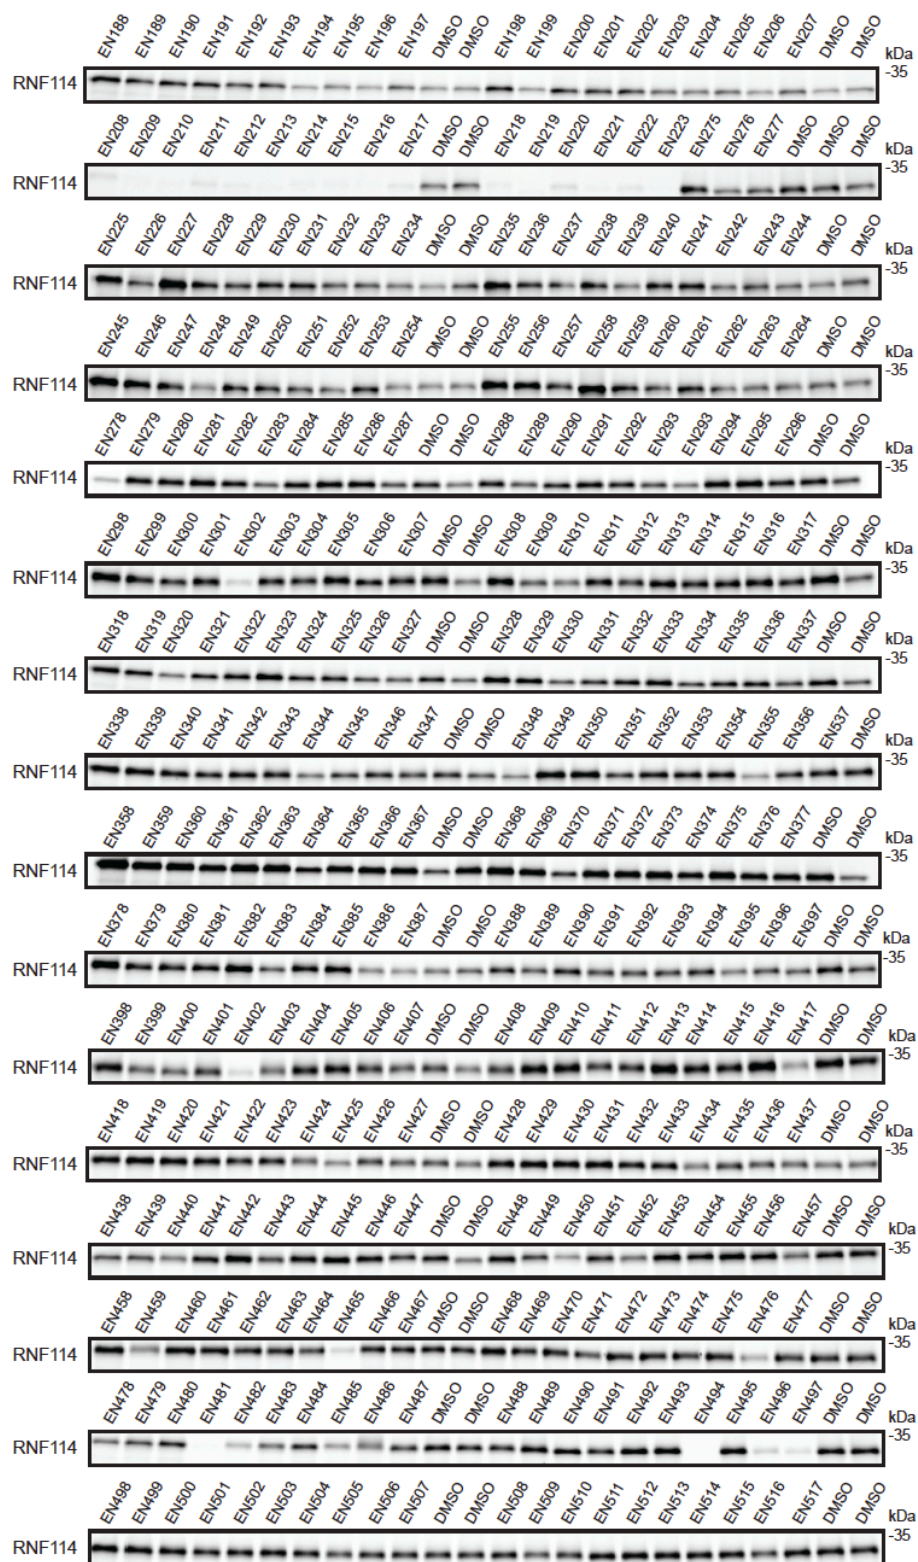

**Figure S1. Related to Figure 2.** Gel-based ABPP assay for screening covalent ligands against IA-rhodamine probe binding to pure RNF114 protein. Loss of fluorescence indicates covalent ligand binding to a cysteine on RNF114. DMSO vehicle or covalent ligands (50  $\mu$ M) were pre-incubated with pure RNF114 protein (0.1  $\mu$ g) for 30 min prior to addition of IA-rhodamine (100 nM) for 30 min at room temperature. Proteins were separated by SDS/PAGE and in-gel fluorescence was quantified. The structures of all the compounds screened can be found in **Table S1**.

a

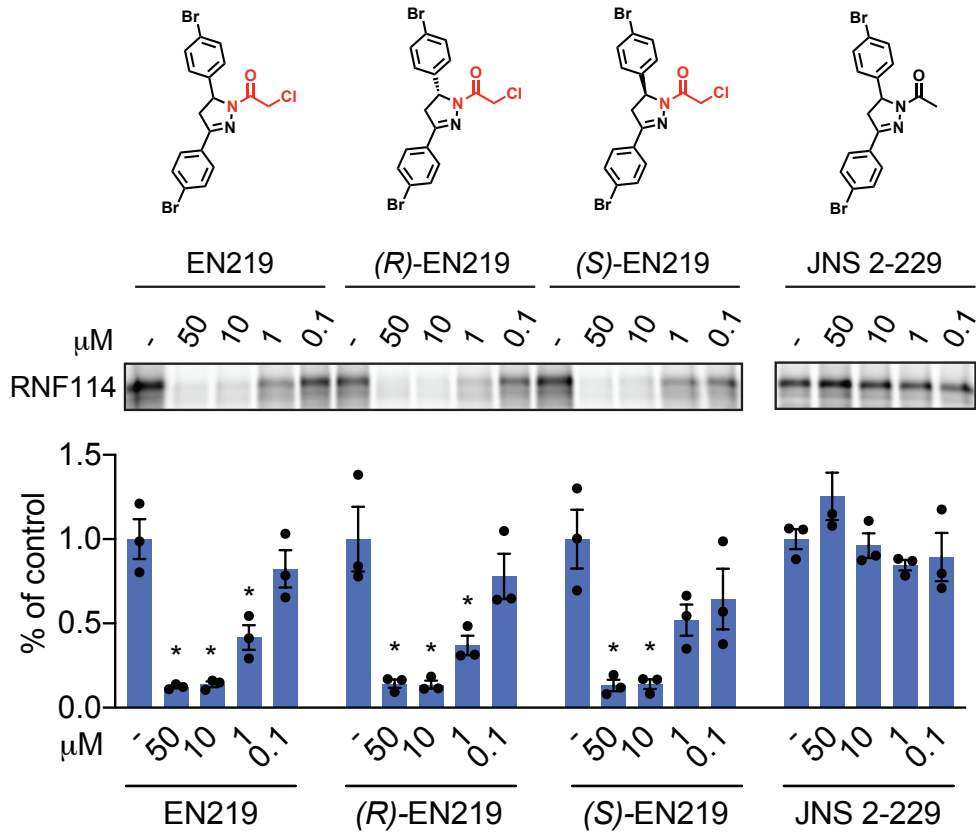

b

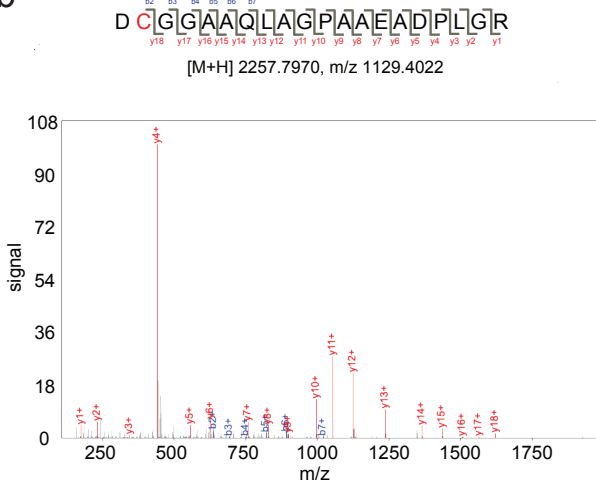

c

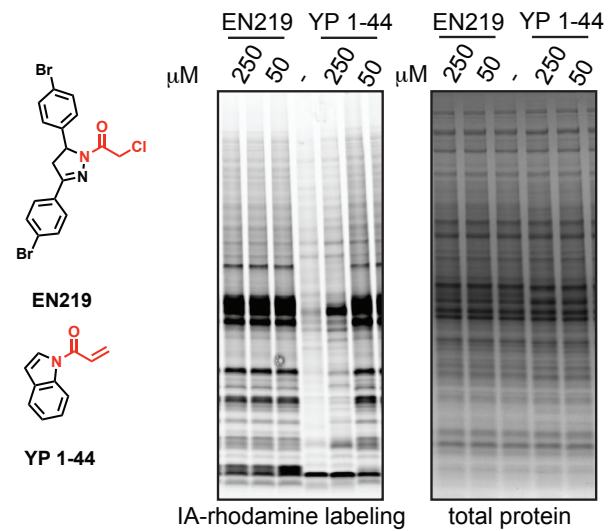

d

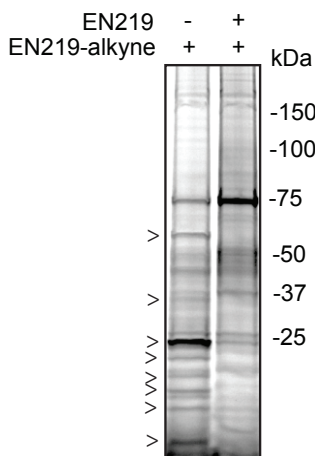

e

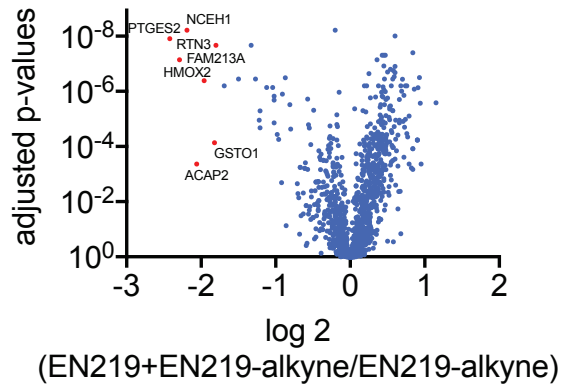

**Figure S2. Related to Figure 2. EN219 reactivity with RNF114 pure protein and TMT-based quantitative proteomic profiling of EN219-alkyne-enriched targets in 231MFP cells.** (a) Dose-response of racemic EN219, (*R*)-EN219, (*S*)-EN219, and non-reactive analog JNS 2-229 interactions with RNF114 by competitive gel-based ABPP. DMSO vehicle or ligands were pre-incubated with pure RNF114 protein (0.1  $\mu$ g) for 30 min prior to addition of IA-rhodamine (100 nM) for 30 min at room temperature. Proteins were separated by SDS/PAGE and in-gel fluorescence was quantified. Gels shown in (a) are representative of n=3 biological replicates/group and bar graphs show average  $\pm$  sem and individual replicate values from quantitation of IA-rhodamine labeling. Statistical significance was calculated with unpaired two-tailed Student's t-test and is expressed as \* $p < 0.05$  compared to vehicle-treated controls. (b) Pure RNF114 protein (10  $\mu$ g, 3.89  $\mu$ M) was incubated with EN219 (50  $\mu$ M) for 1 h and subsequent tryptic digests of RNF114 protein were analyzed by LC-MS/MS to look for EN219 covalent modification. The Cysteine 8 highlighted in red was found to be modified. Shown is the mass spectra of the EN219 covalent adduct on the RNF114 tryptic peptide. (c) gel-based ABPP of EN219 and promiscuous scout ligand YP 1-44 in 231MFP breast cancer cell lysate *in vitro*. 231MFP cell lysate (20  $\mu$ g) were pre-incubated with DMSO vehicle or covalent ligand for 30 min prior to IA-rhodamine labeling (1  $\mu$ M) for 30 min at room temperature. Proteins were separated by SDS/PAGE and visualized by in-gel fluorescence. Shown is a representative gel from n=3 biologically independent replicates. (d) 231MFP cells were treated with DMSO vehicle or EN219 (35  $\mu$ M) 30 min prior to treating cells with DMSO or EN219-alkyne probe (2  $\mu$ M) for 90 min. Resulting cell lysates were subjected to CuAAC with rhodamine-azide and EN219-alkyne-labeled proteins were separated by SDS/PAGE and visualized by in-gel fluorescence. Proteins that show competition with EN219 are labeled with ">". Gel is a representative of n=3 biologically independent replicates/group. (e) 231MFP cells were treated with DMSO vehicle or EN219 (20  $\mu$ M) 30 min prior to treating cells with DMSO or EN219-alkyne probe (2  $\mu$ M) for 90 min. Resulting cell lysates were subjected to CuAAC with biotin-azide to append a biotin enrichment handle onto EN219-alkyne labeled proteins *ex situ*. EN219-alkyne labeled proteins were subsequently avidin-enriched, digested with trypsin, and resulting tryptic peptides from each treatment group were labeled with TMT reagents and combined and fractionated for LC-MS/MS analysis. Shown are average TMT ratios and adjusted p-values comparing EN219 pre-treated EN219-alkyne labeled groups to EN219-alkyne labeled groups to identify EN219-alkyne-labeled proteins that are competed by the parent compound EN219. Shown in red are proteins that show EN219+EN219-alkyne versus EN219-alkyne ratios  $< 0.33$  with adjusted  $p < 0.05$ . The full dataset can be found in **Table S3**.

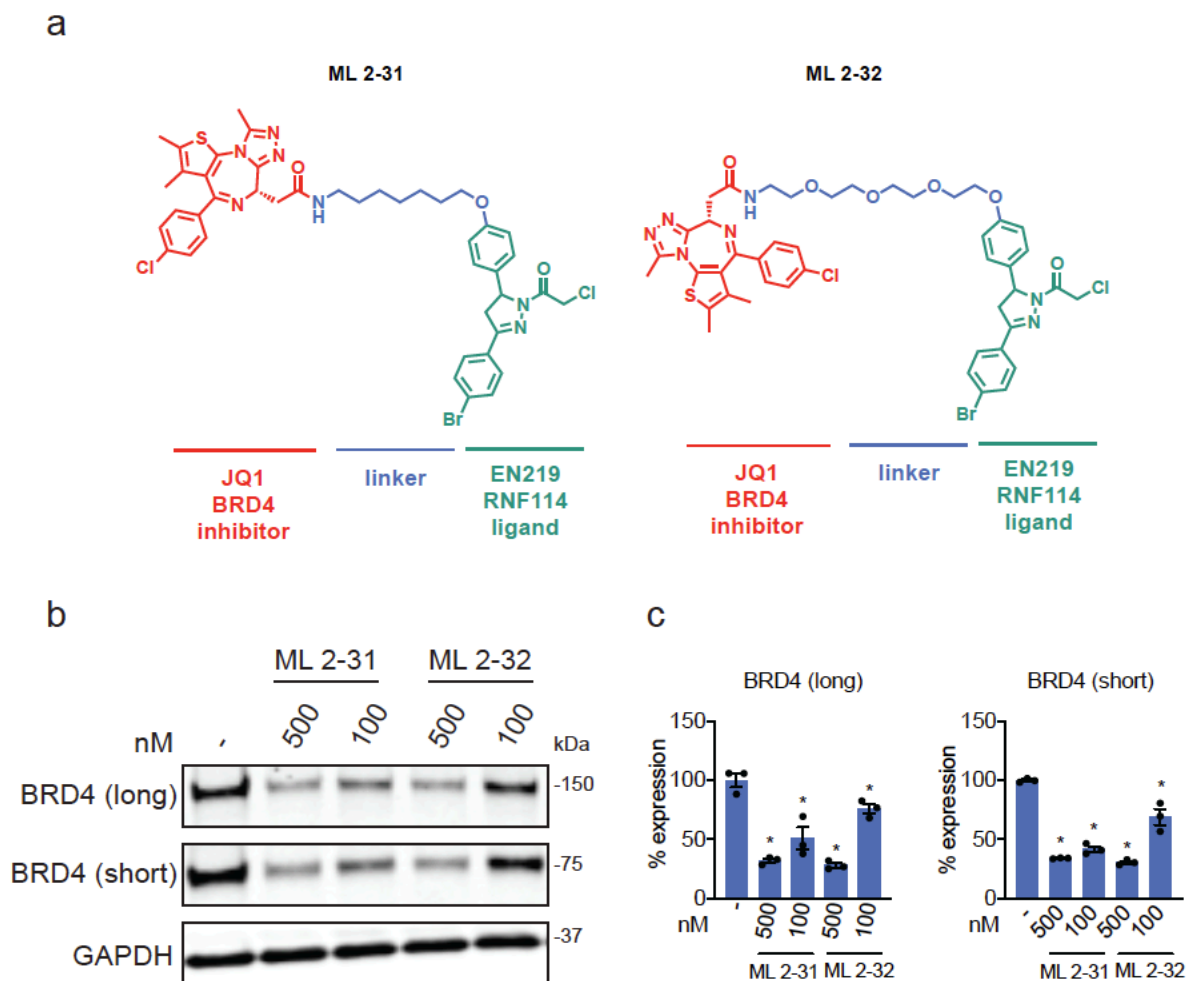

**Figure S3. Related to Figure 3. EN219-based BRD4 degraders. (a)** Structure of ML 2-31 and ML 2-32, EN219-based BRD4 degraders linking EN219 to BET inhibitor JQ1 with two different linkers. **(b)** Degradation of BRD4 by ML 2-31 and ML 2-32. 231MFP cells were treated with DMSO vehicle or ML 2-31 or ML 2-32 for 8 h and the long and short isoforms of BRD4 and loading control GAPDH were detected by Western blotting. **(c)** Percentage of BRD4 degradation quantified from **(b)**. Data shown in **(c)** are average and individual replicate values. Blots shown in **(b)** are representative of n=3 biological replicates/group.

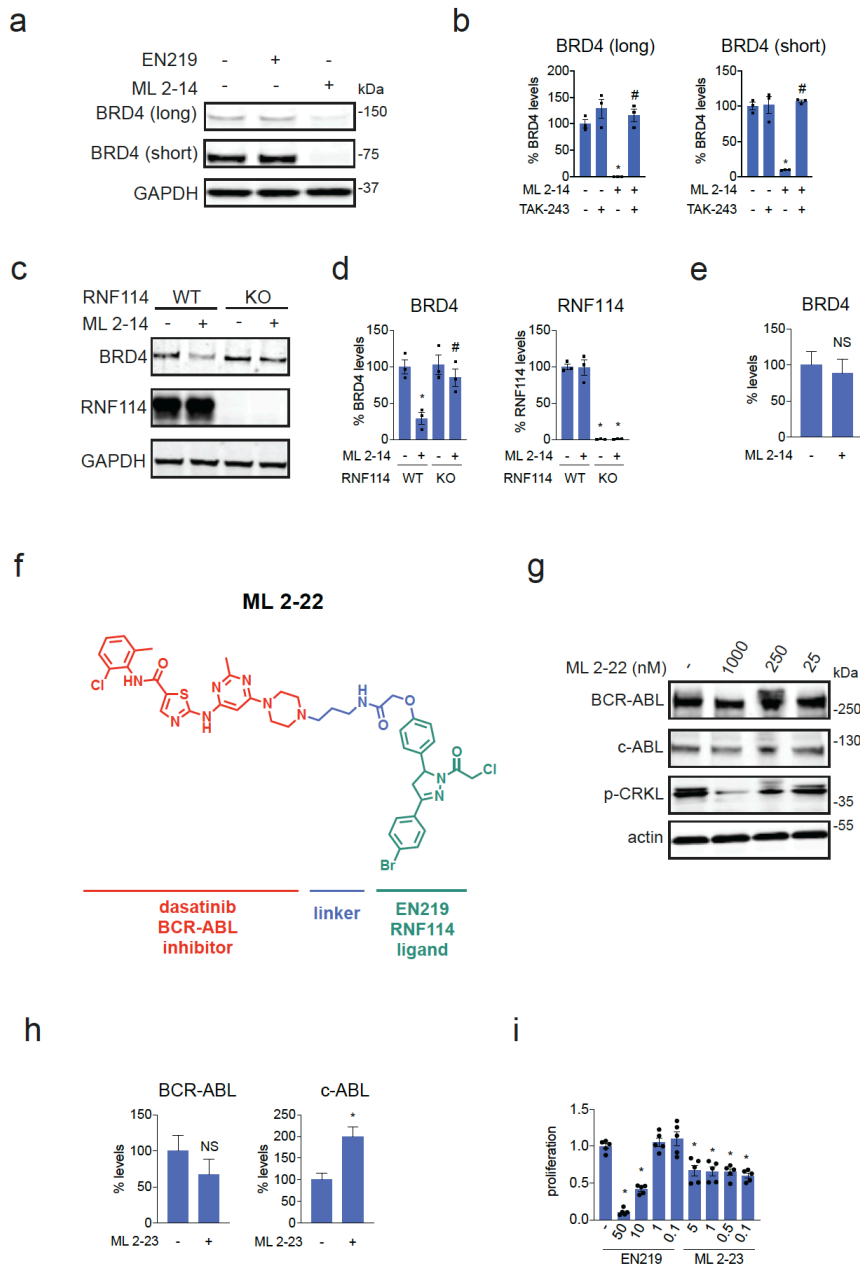

**Figure. S4. Related to Figures 3 and 4. ML 2-14 and ML 2-22 mediated degradation of BRD4 and BCR-ABL, respectively.** (a) BRD4 and loading control GAPDH expression in 231MFP cells treated with DMSO, EN219 (100 nM), and ML 2-14 (100 nM) for 20 h detected by Western blotting. (b) Quantification of data from Figure 3f. (c) Degradation of BRD4 (long isoform) in RNF114 wild-type (WT) or knockout (KO) HAP1 cells in a distinct separate experiment from the data shown in Figure 3i. RNF114 WT or KO HAP1 cells were treated with DMSO vehicle or ML 2-14 (1  $\mu$ M) for 16 h and BRD4, RNF114, and loading control GAPDH levels were detected by Western blotting. (d) Quantification of data from (c). (e) Quantitative PCR data of BRD4 mRNA expression in 231MFP cells treated with vehicle or ML 2-14 (100 nM, 16 h). (f) Structure of ML 2-22 degrader that linked EN219 to dasatinib. (g) BCR-ABL, c-ABL, p-CRKL, and loading control actin levels assessed by Western blot from K562 cells treated with DMSO vehicle or ML 2-22 for 20 h. (h) Quantitative PCR data of BCR-ABL and c-ABL mRNA expression in K562 cells treated with vehicle or ML 2-23 (5  $\mu$ M, 16 h). (i) Cell proliferation of K562 cells treated with DMSO vehicle, EN219, or ML 2-23 for 16 h, assessed by WST reagent. Blots in (a, c, g) are a representative from n=3 biological replicates/group. Data shown in (b, d, e, h, i) are average  $\pm$  sem with n=3 biological replicates/group for (b, d, e, h) and n=5 biological replicates/group in (i). Statistical significance was calculated with unpaired two-tailed Student's t-test and is expressed as \*p<0.05 compared to vehicle-treated controls or vehicle-treated wild-type controls in (b, d, e, h, i) and #p<0.05 compared to ML 2-14 treated groups or ML 2-14-treated wild-type groups. NS denotes not significant.
